# Supplementary material for: Identification of an immune-related risk signature for predicting prognosis in clear cell renal cell carcinoma
Source: Aging (Albany NY). 2020 Feb 6;12(3):2302–32. doi: 10.18632/aging.102746 (PMC7041771; doi:10.18632/aging.102746)
Supplement: Supplementary Figures [file aging-12-102746-s007..pdf]

## SUPPLEMENTARY FIGURES

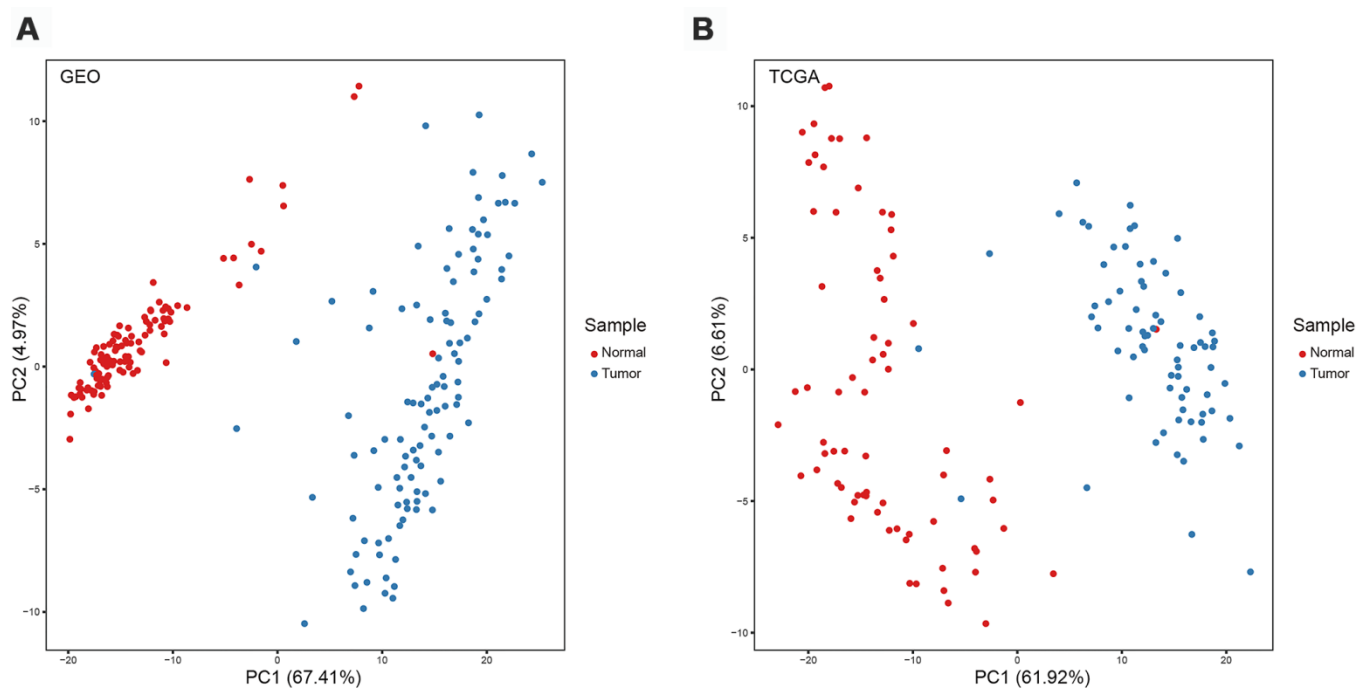

**Supplementary Figure 1. Principal component analysis highlighting different immune phenotypes in normal and ccRCC tissue samples. (A) Samples from the GEO database. (B) Samples from the TCGA database.**

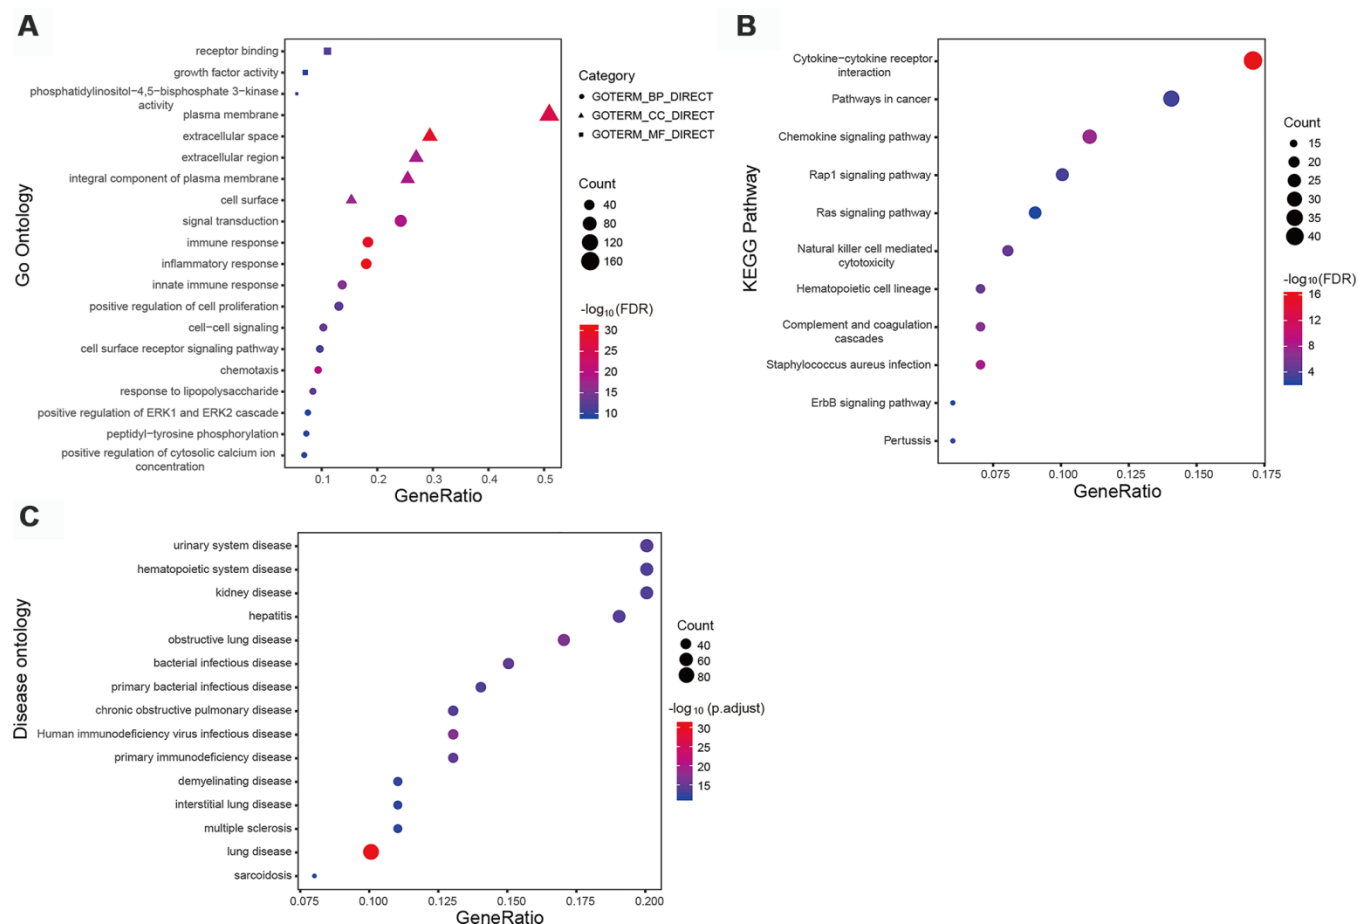

**Supplementary Figure 2. Functional enrichment of 326 differentially expressed IRGs.** (A) Top 20 most significant Gene Ontology (GO) terms. (B) Kyoto Encyclopedia of Genes and Genomes pathway analysis. FDR < 0.01 indicated significant enrichment. (C) Top 15 most significant disease ontology (DO) terms identified by DO analysis.

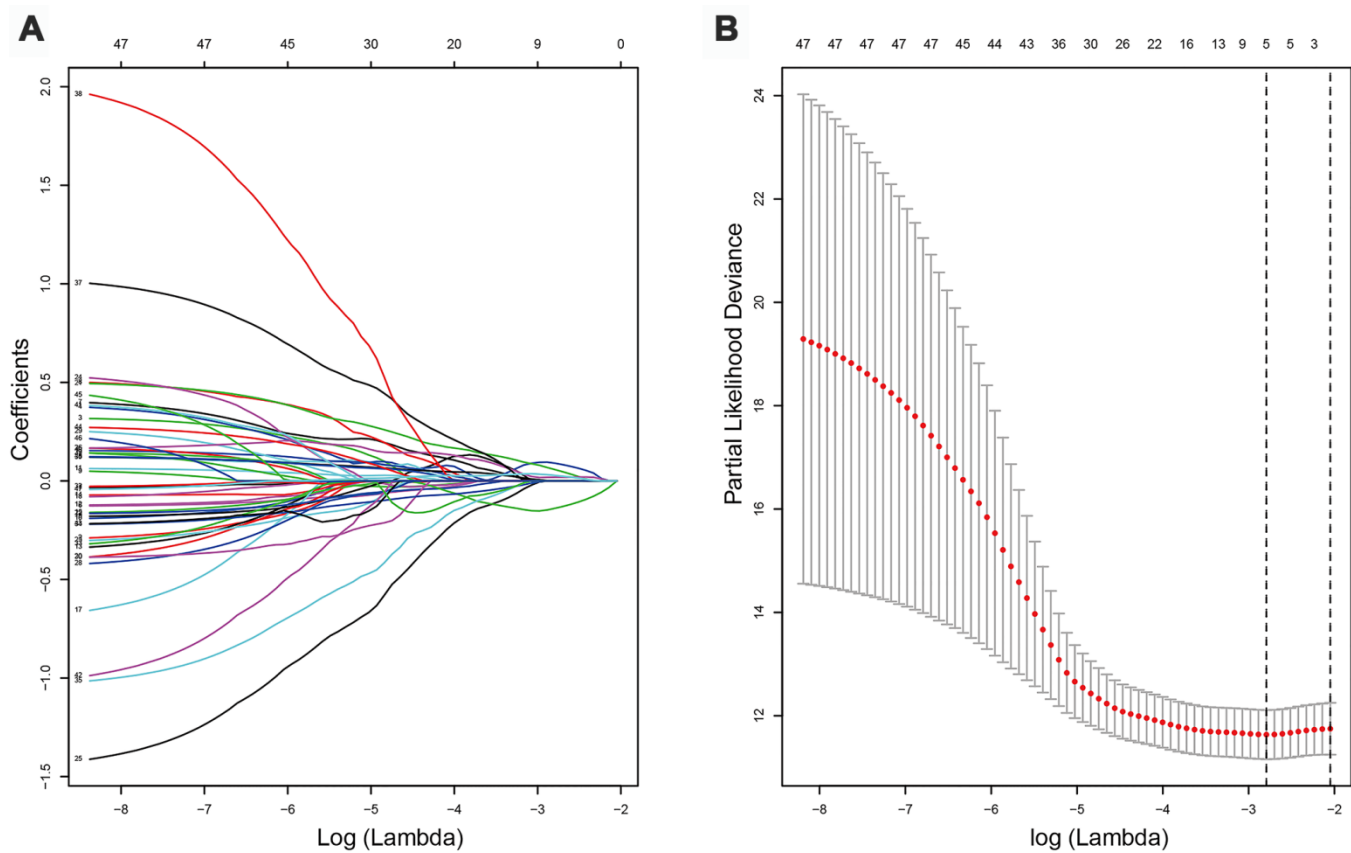

**Supplementary Figure 3. LASSO Cox regression model.** (A) Plot of LASSO coefficient profiles. (B) Plot of partial likelihood deviance for the 47 immune-related hub genes in the TCGA discovery set.

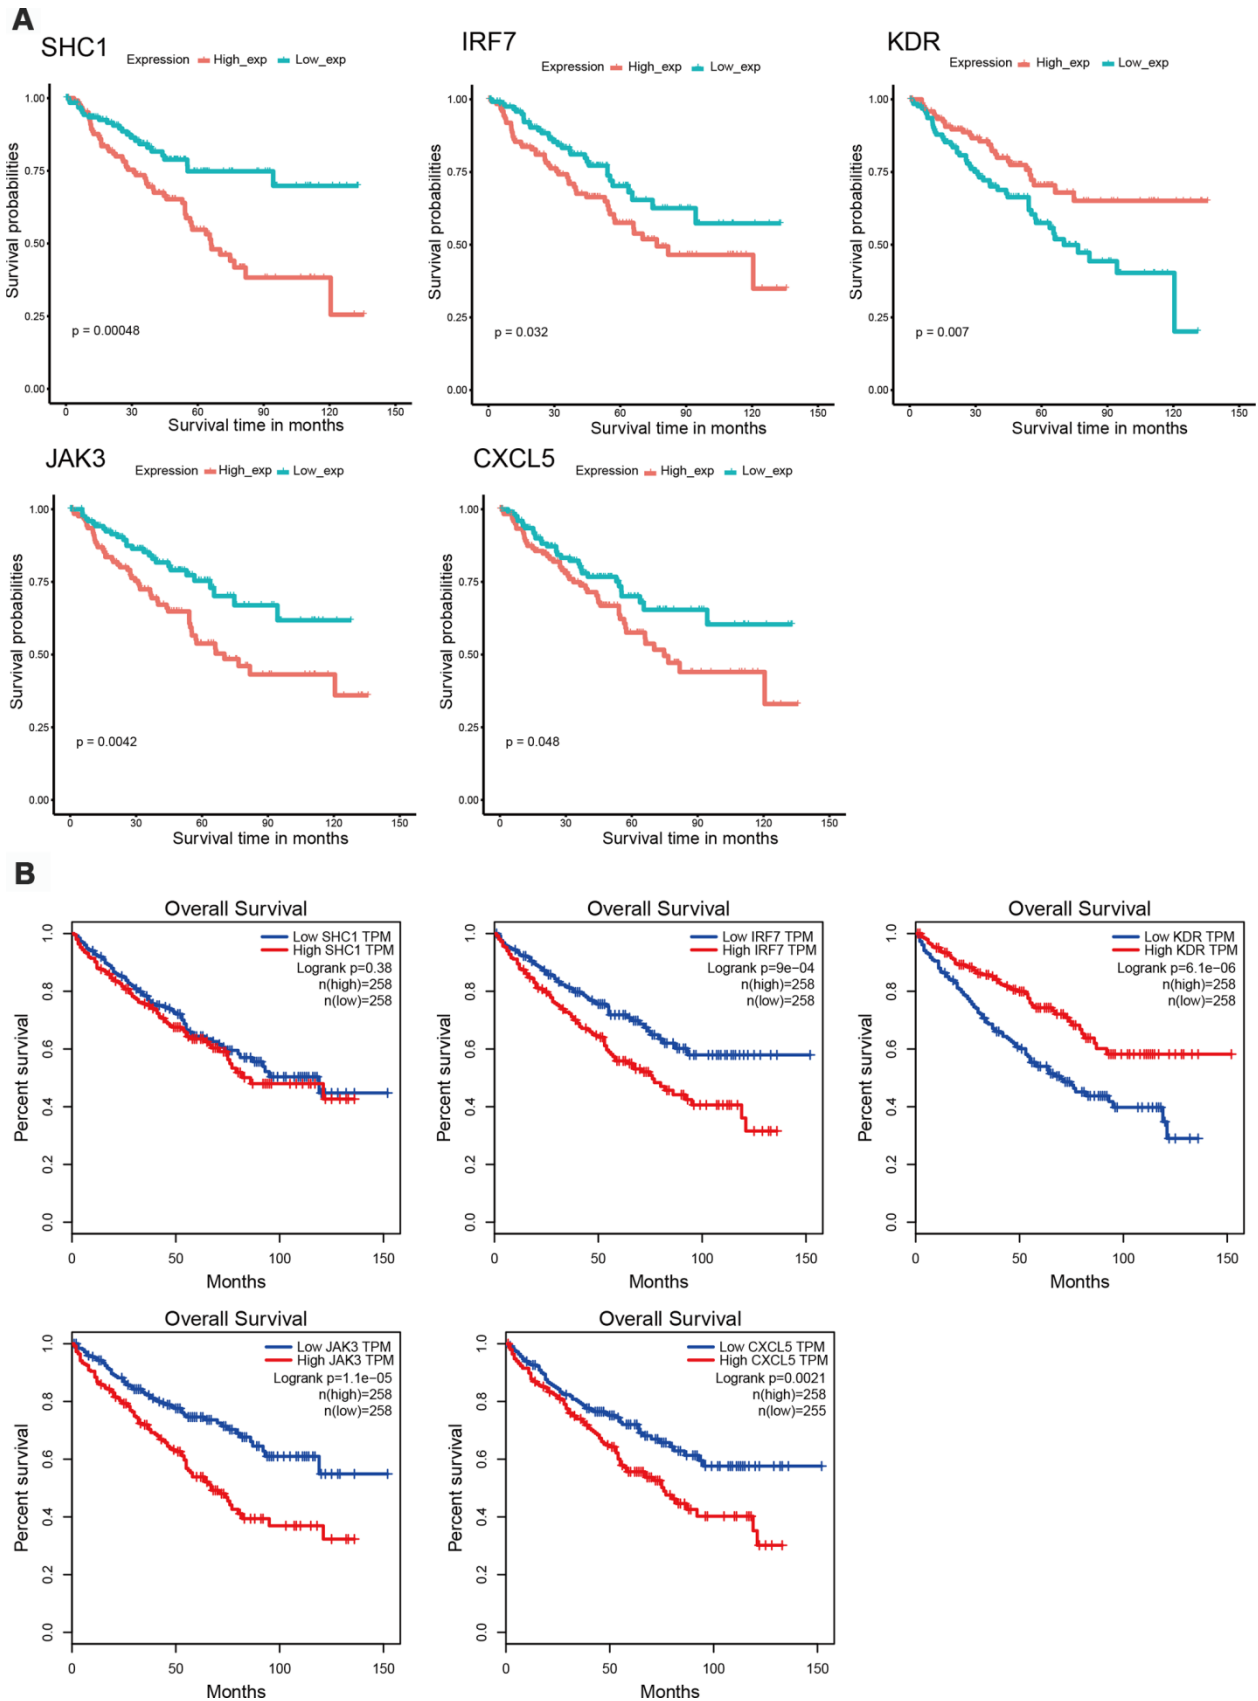

**Supplementary Figure 4. Kaplan-Meier analysis of the 5 genes used to construct the immune-related risk signature for ccRCC. (A) Analysis in the TCGA discovery set. (B) Further validation in the GEPIA database.**

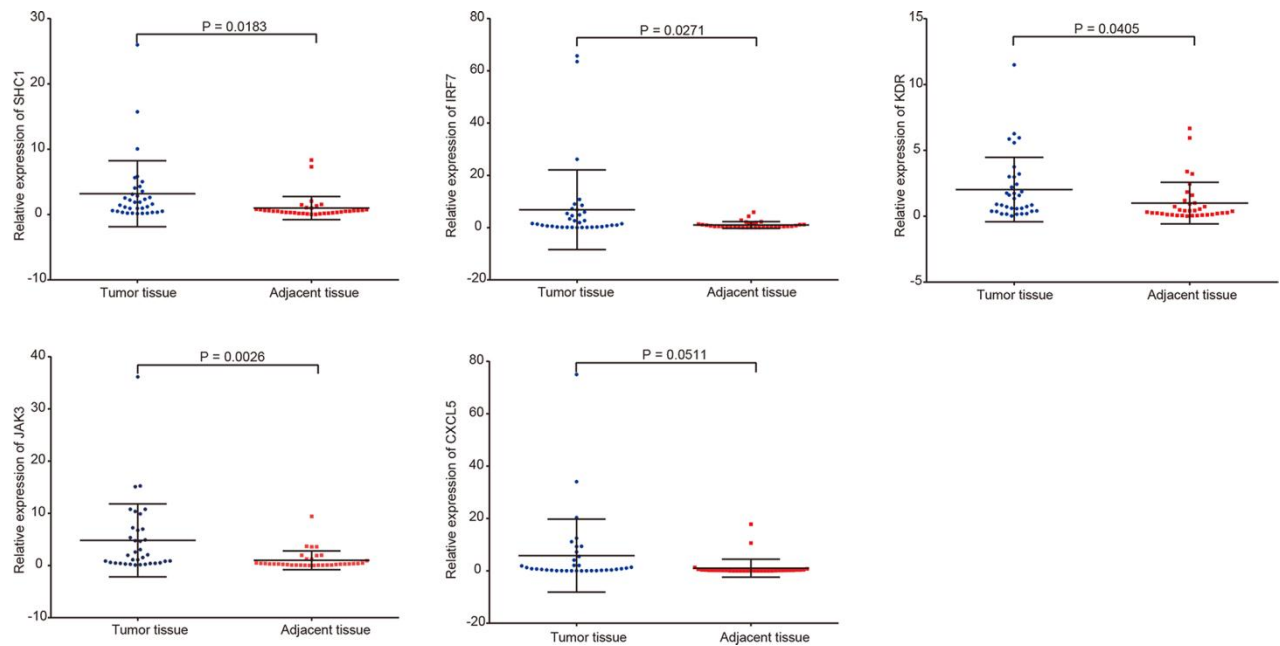

**Supplementary Figure 5. Validation of the five-IRG signature in matched normal and ccRCC specimens harvested at The First Affiliated Hospital of Anhui Medical University (n = 35).** In agreement with results from the other databases analyzed, the five genes were up-regulated in ccRCC samples compared with adjacent, normal ones.

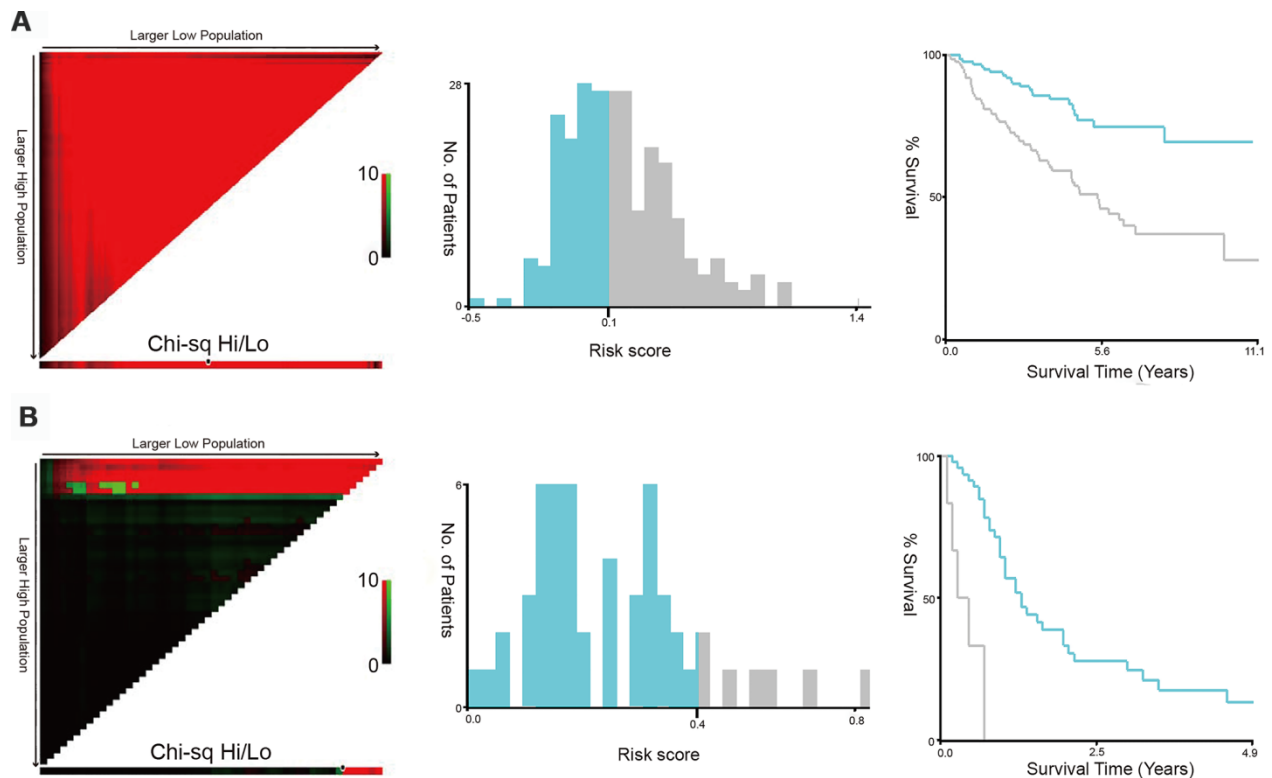

**Supplementary Figure 6. X-tile analysis for selection of optimum cut-off value for the IRG signature's risk score.** Left panels indicate an inverse association (red) between the risk score and overall survival. Middle panels show risk score distribution. Right panels show Kaplan-Meier survival plots for high-risk and low-risk groups. (A) Analysis of the TCGA discovery set. (B) Analysis of the E-MTAB-3267 dataset.

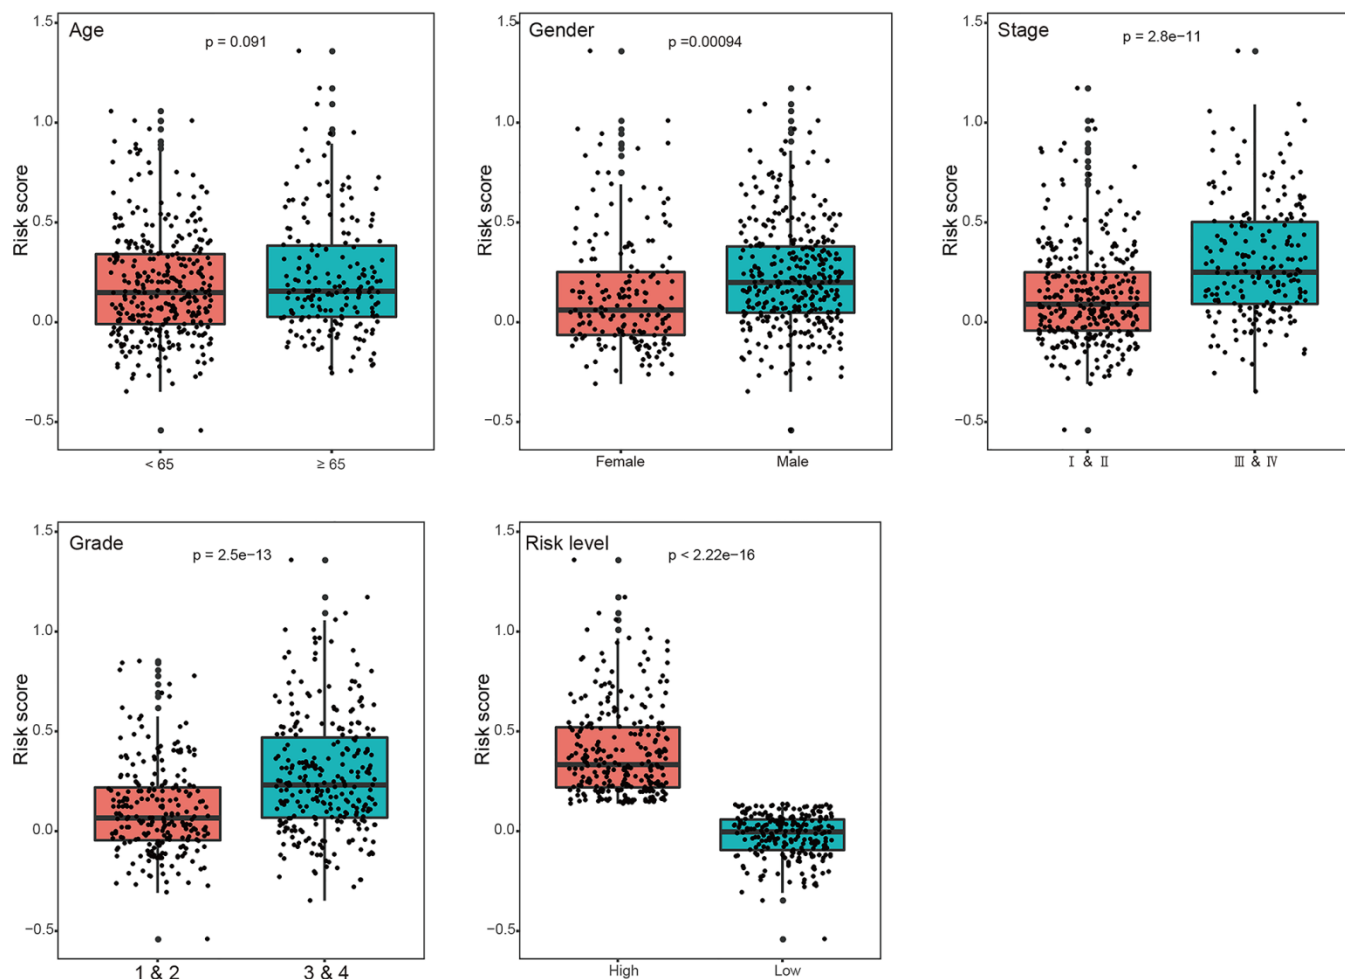

**Supplementary Figure 7. Correlation between clinical factors and IRG signature's risk score.** The bar chart shows a trend toward higher risk score for male gender, advanced stage, high grade, and high-risk classification groups.

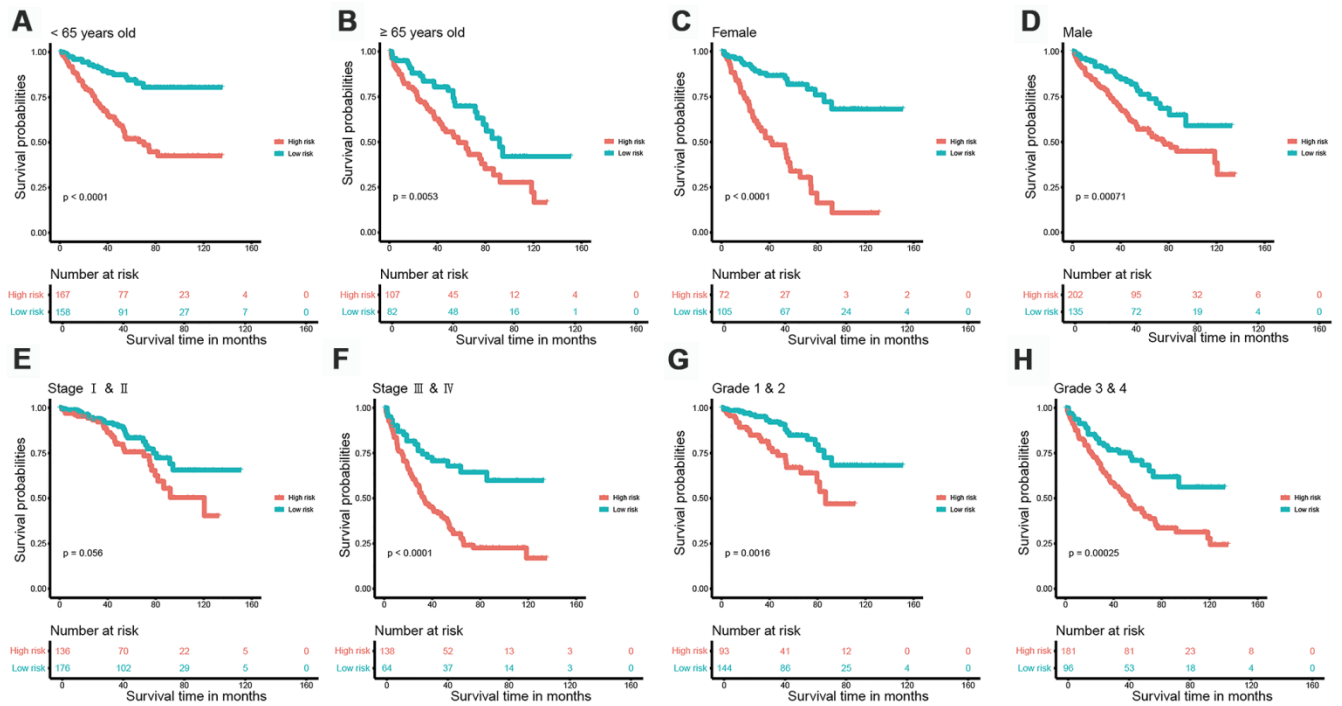

**Supplementary Figure 8. IRG signature-based sub-group analysis.** Kaplan-Meier analysis of the risk signature in patients (A) aged < 65 years, (B) aged ≥ 65 years, (C) female, (D) male, (E) stage I & II, (F) stage III & IV, (G) grade 1 & 2, and (H) grade 3 & 4.

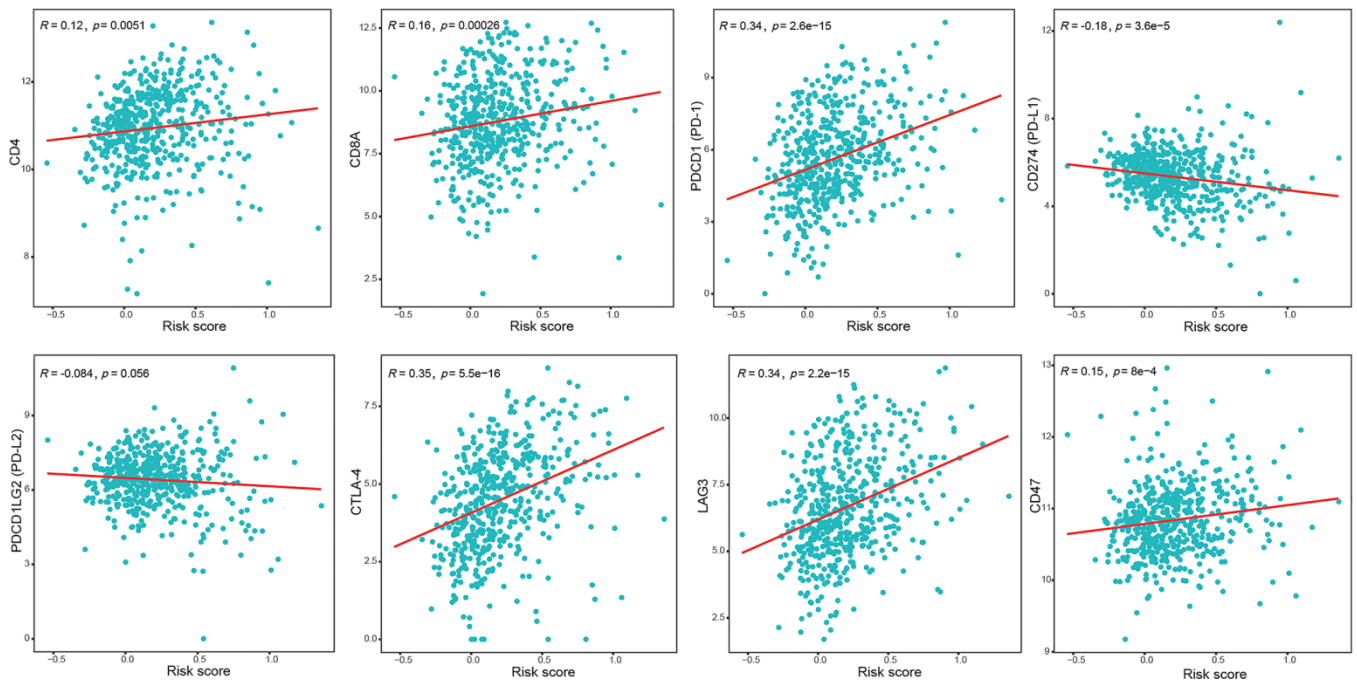

**Supplementary Figure 9. Pearson's correlation analysis of the risk score of the signature and the expression of T-cell and immune checkpoint genes.**

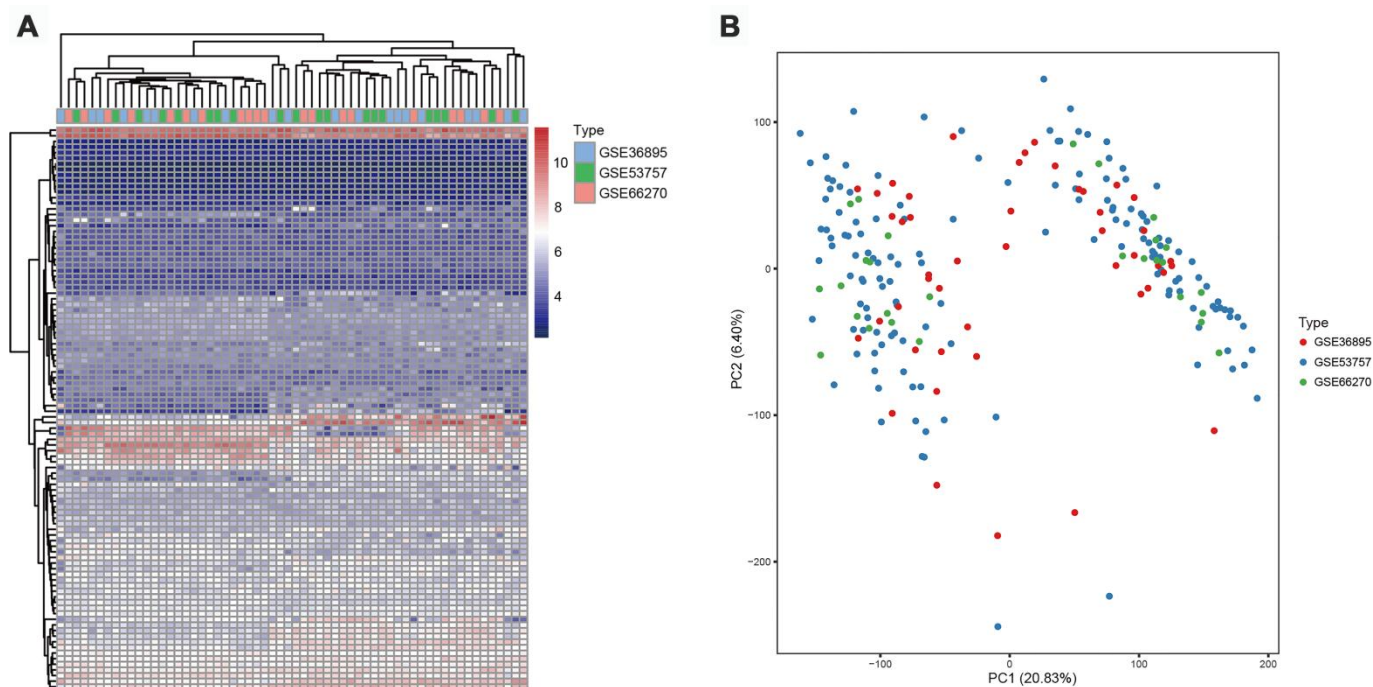

**Supplementary Figure 10. Assessment of correction effects for the 3 GEO datasets.** (A) A heat map based on the top 100 genes from 20 random samples in the 3 datasets shows no distinctly different sample clustering in each dataset. (B) Principal component analysis showing random sample distribution in the 3 datasets.
